# Supplementary material for: One-step electrodeposition of V-doped NiFe nanosheets for low-overpotential alkaline oxygen evolution
Source: Royal Society of Chemistry journal article supplement (doi:10.1039/d3dt03066k), 2023-01-01
Supplement: d3dt03066k1.pdf [file d3dt03066k1.pdf]

## Supporting information

### One-step Electrodeposition of the V-doped NiFe Nanosheets for Low-overpotential Alkaline Oxygen Evolution

*Qingxiang Kong<sup>a,b</sup>, Junli Wang<sup>c</sup>, Zhenwei Liu<sup>b</sup>, Song Wu<sup>b</sup>, Xiaoning Tong<sup>b</sup>, Naixuan*

*Zong<sup>a,b</sup>, Bangfu Huang<sup>b</sup>, Ruidong Xu<sup>a,b,\*</sup>, Linjing Yang<sup>a,b\*</sup>*

*<sup>a</sup> State Key Laboratory of Complex Nonferrous Metal Resources Clean Utilization,  
Kunming University of Science and Technology, Kunming 650093, China*

*<sup>b</sup> Faculty of Metallurgical and Energy Engineering, Kunming University of Science and  
Technology, Kunming 650093, China*

*<sup>c</sup> Research Center for Analysis and Measurement, Kunming University of Science and  
Technology, Kunming 650093, China*

---

\* E-mail addresses: [rdxupaper@aliyun.com](mailto:rdxupaper@aliyun.com) (R. Xu), [eslinjingyang@kust.edu.cn](mailto:eslinjingyang@kust.edu.cn) (L. Yang).

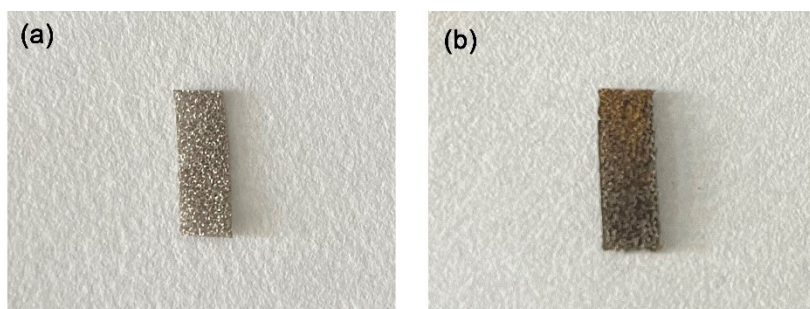

**Fig. S1.** Optical images of (a) NF array and (b) NiFeV/NF array. The NiFeV /NF array is darker than the NF array.

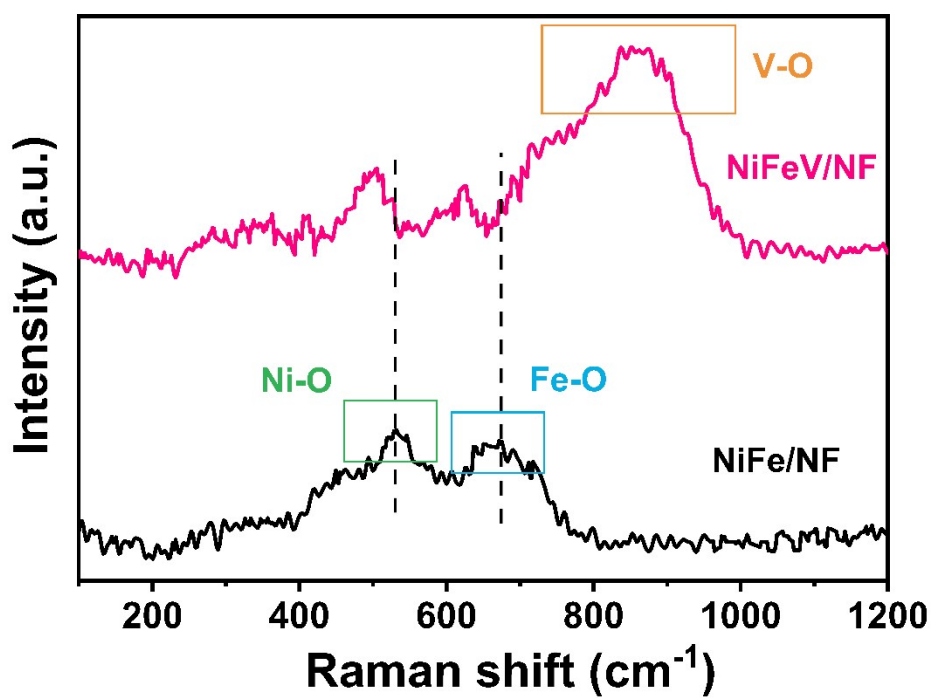

**Fig. S2.** Raman spectra of NiFeV/NF and NiFe/NF.

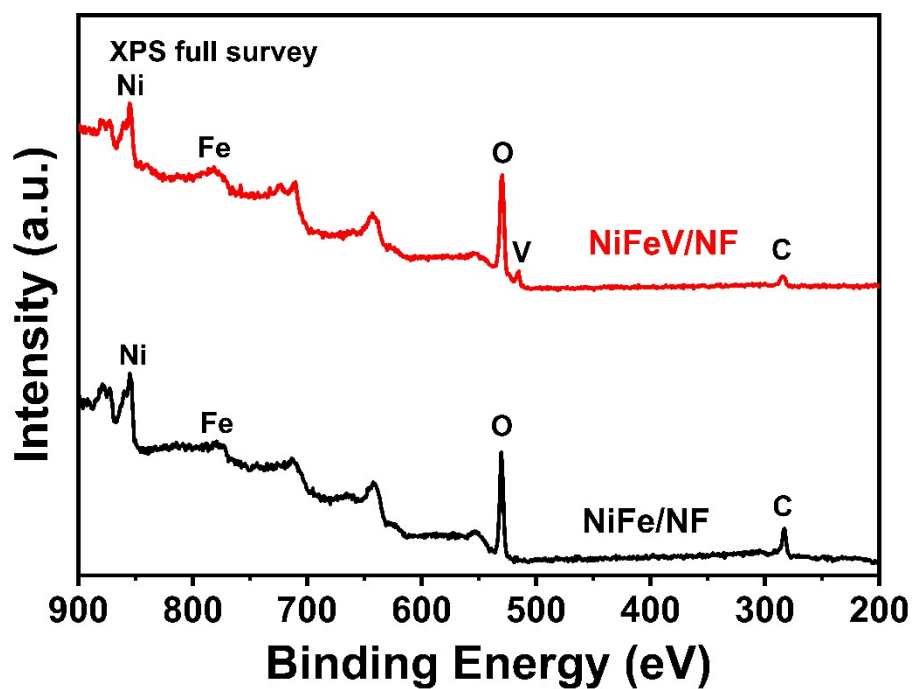

Fig. S3. XPS spectra of NiFeV/NF and NiFe/NF.

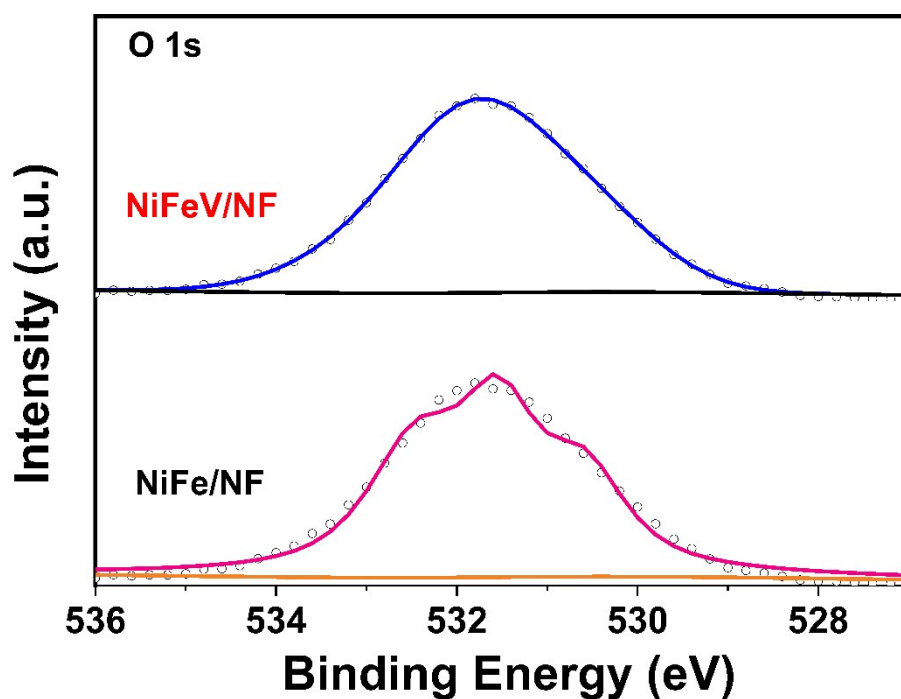

Fig. S4. High-resolution XPS spectra of O1s in the prepared samples..

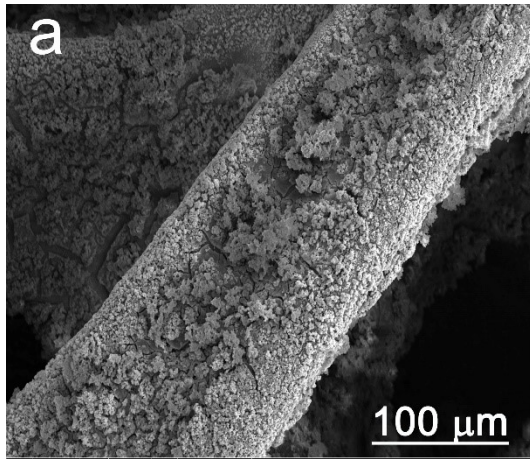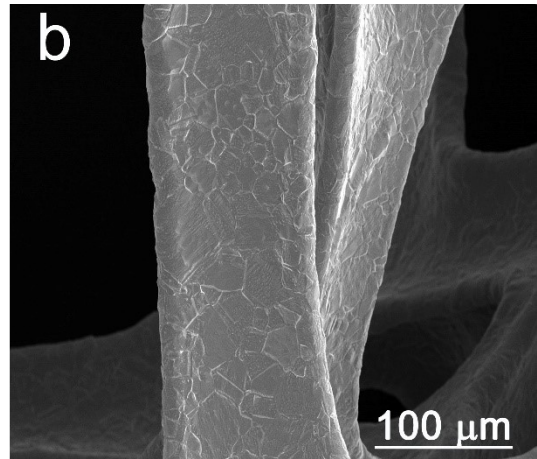

**Fig. S5.** SEM images of bare NiFeV/NF (a) and NF (b).

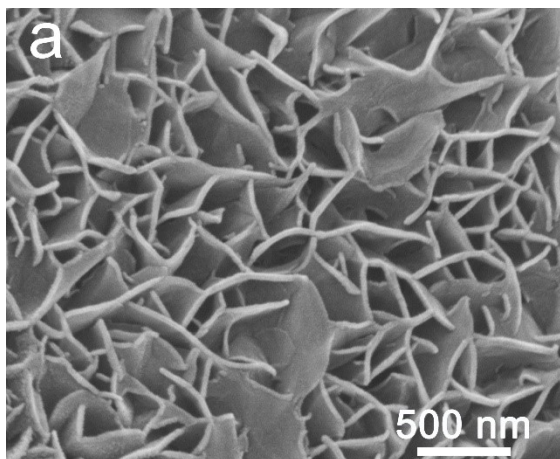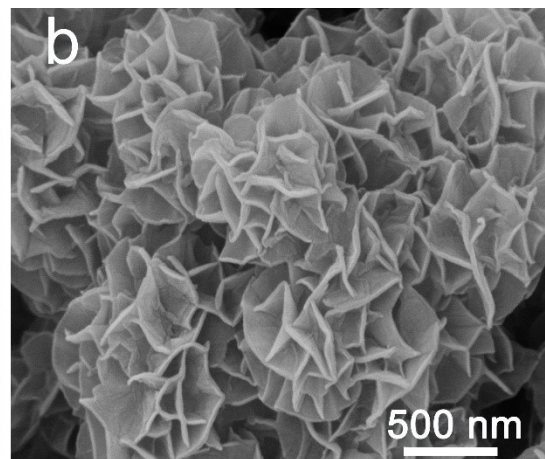

**Fig. S6.** SEM images of NiFe/NF (a) and NiFe/NF (b).

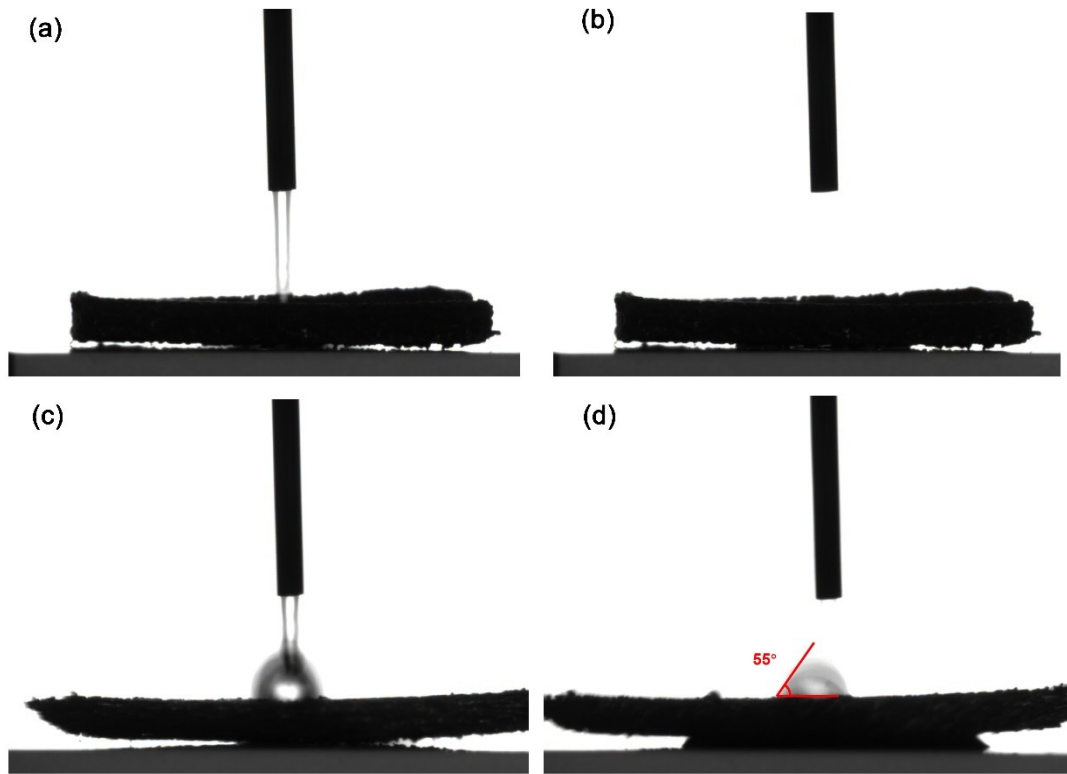

**Fig. S7.** Surface wettability of the NiFeV/NF (a,b) and the NiFe/NF (c,d).

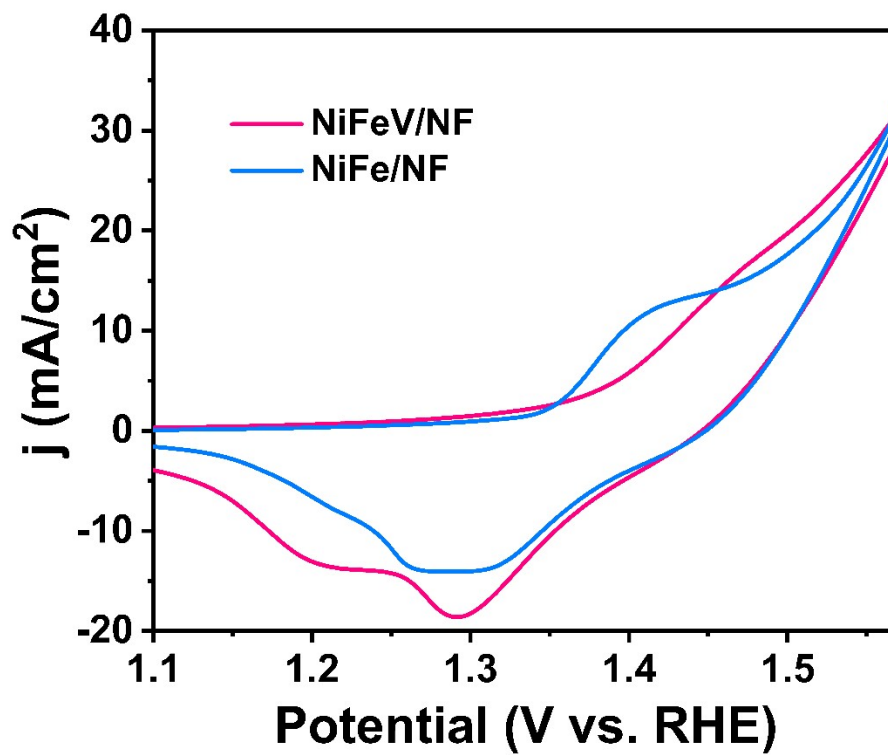

Fig. S8. CV curves of NiFeV/NF and NiFe/NF.

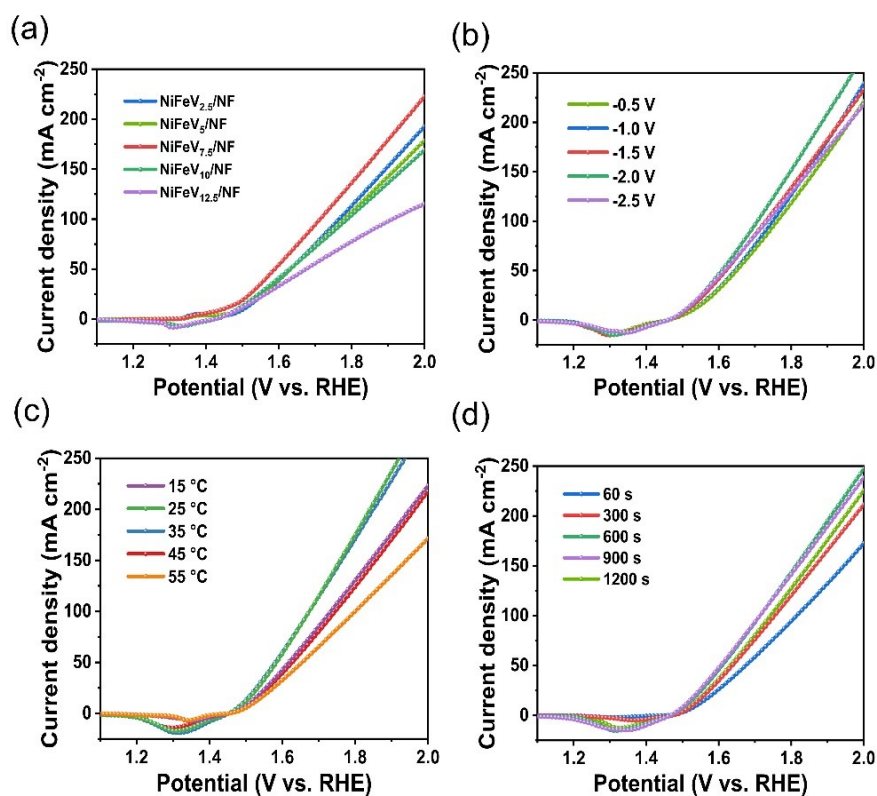

**Fig. S9.** The OER LSV curves of NiFeV/NF in different (a) Concentration of V (mM) (b) electrodeposition voltages, (c) electrodeposition temperature, and (d) electrodeposition temperature time.

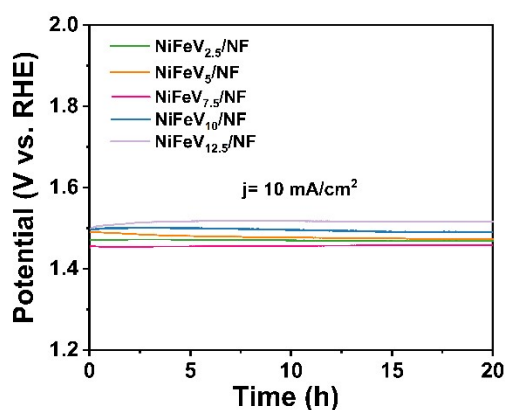

**Fig. S10.** The potential stability test of NiFeV/NF with different V concentrations at a current density of  $10 \text{ mA/cm}^2$  at 1 M KOH

**Table S1.** The OER electrochemical impedance parameters obtained by simulating the Nyquist plots in Figure 3e with an appropriate equivalent circuit model.

| Electrocatalysts | $R_s$<br>( $\Omega\cdot\text{cm}^2$ ) | $\text{CPE}_1\text{-T}$<br>(F) | $\text{CPE}_1\text{-P}$<br>(F) | $R_1$<br>( $\Omega\cdot\text{cm}^2$ ) | $\text{CPE}_2\text{-T}$<br>(F) | $\text{CPE}_2\text{-P}$<br>(F) | $R_{ct}$<br>( $\Omega\cdot\text{cm}^2$ ) |
|------------------|---------------------------------------|--------------------------------|--------------------------------|---------------------------------------|--------------------------------|--------------------------------|------------------------------------------|
| NiFe/NF          | 1.535                                 | 0.1022                         | 0.69979                        | 0.18817                               | 0.080326                       | 0.95788                        | 0.85983                                  |
| NiFeV/NF         | 1.512                                 | 0.10828                        | 1.79049                        | 0.12038                               | 0.19539                        | 0.93286                        | 0.38797                                  |



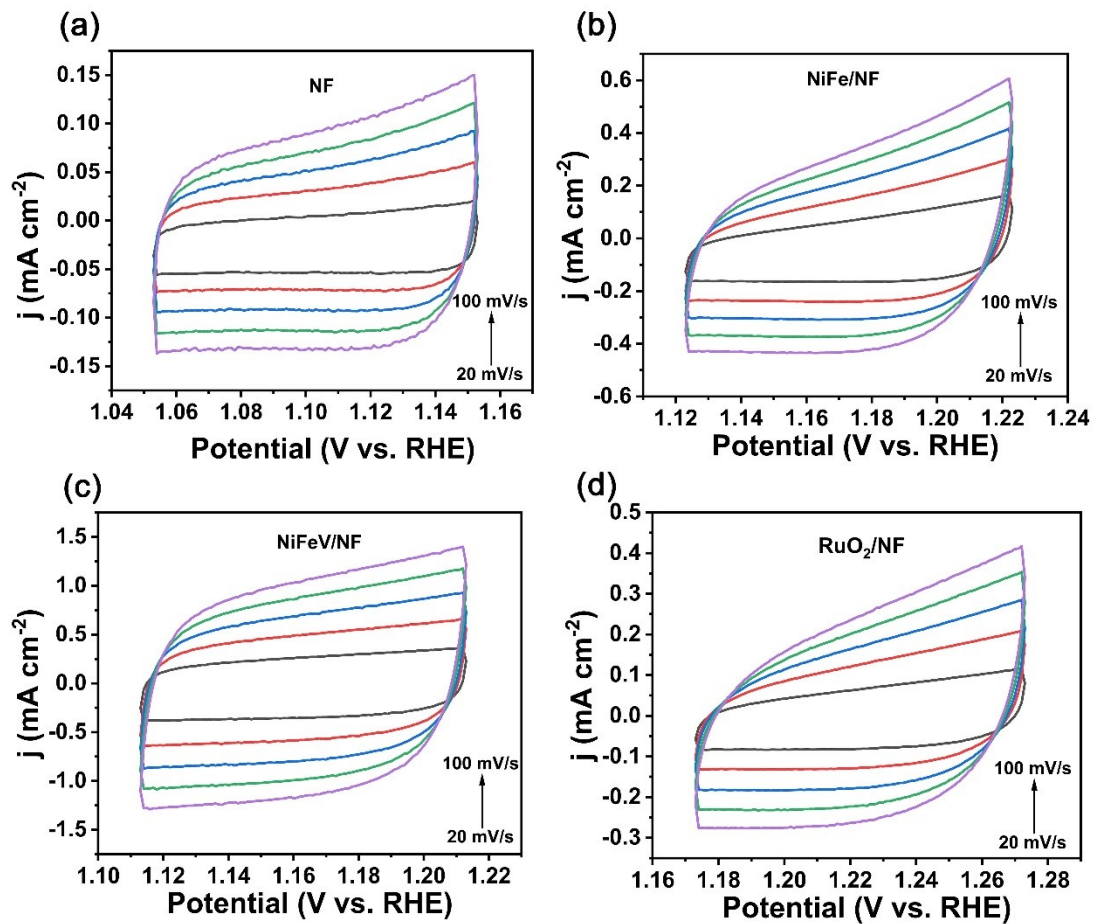

**Fig. S11.** Cyclic voltammograms (CVs) at different scan rates of the prepared samples. a NF, b NiFe/NF, c NiFeV/NF, d  $\text{RuO}_2/\text{NF}$ .

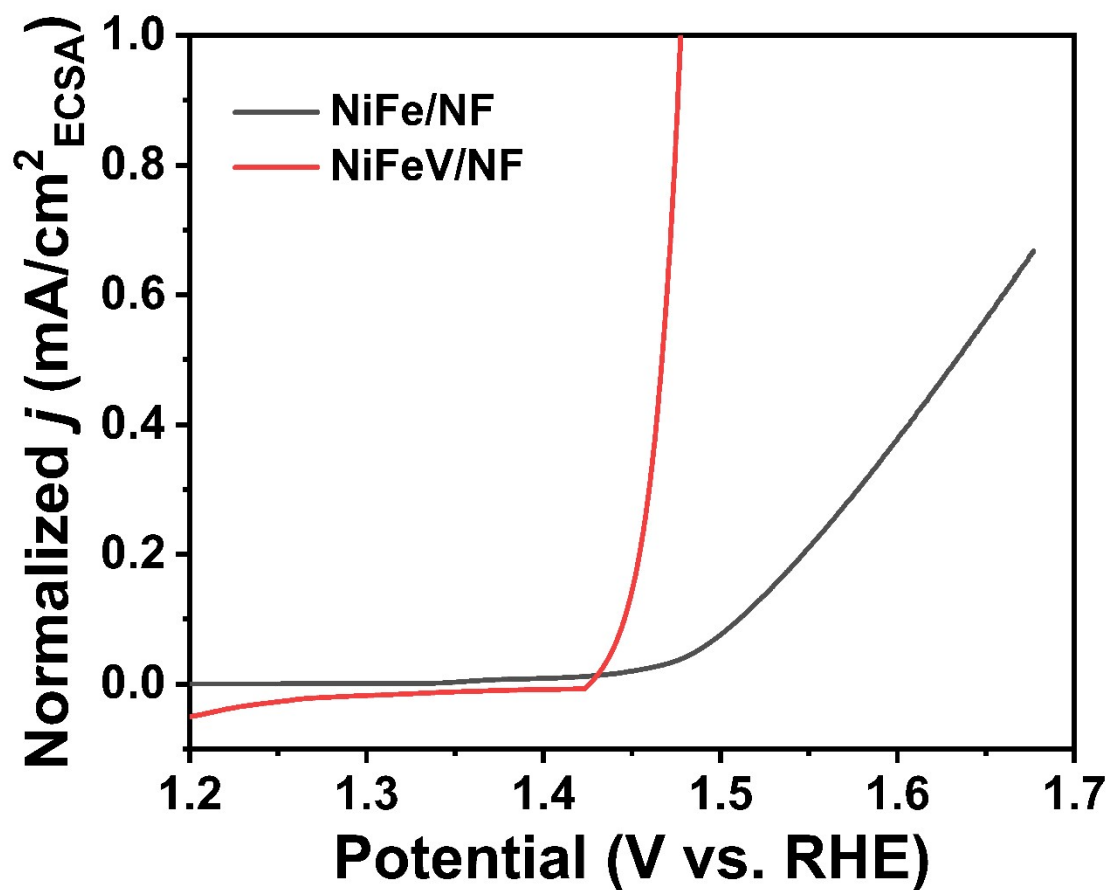

Fig. S12. OER polarization curves for NiFeV/NF and NiFe/NF, normalized by electrical surface area (ECSA).

**Table S2.** Comparison of the potentials at 10 mA cm<sup>-2</sup> with recently reported OER catalysts

| Catalyst                                              | Electrolyte | Overpotential (mV) at 10 mA cm <sup>-2</sup> | Tafel slope (mV dec <sup>-1</sup> ) | Reference |
|-------------------------------------------------------|-------------|----------------------------------------------|-------------------------------------|-----------|
| NiFeV/NF                                              | 1.0 M KOH   | 218                                          | 33                                  | This work |
| NiCoP/CC                                              |             | 242                                          | 64.2                                | 1         |
| NiFe LDH/NF                                           |             | 256                                          | 50                                  | 2         |
| Co-Fe-P-Se/NC                                         |             | 270                                          | 42                                  | 3         |
| Ni <sub>3</sub> FeN/r-GO                              |             | 270                                          | 54                                  | 4         |
| N-NiMoO <sub>4</sub> /NiS <sub>2</sub> @CFC           |             | 283                                          | 44.3                                | 5         |
| FeCoNi                                                |             | 288                                          | 60                                  | 6         |
| NiFeMn LDH                                            |             | 289                                          | 47                                  | 7         |
| NaNi <sub>10.9</sub> Fe <sub>0.1</sub> O <sub>2</sub> |             | 290                                          | 44                                  | 8         |
| NiFe@NC                                               |             | 300                                          | 56                                  | 9         |
| HCM@Ni-N                                              |             | 304                                          | 76                                  | 10        |

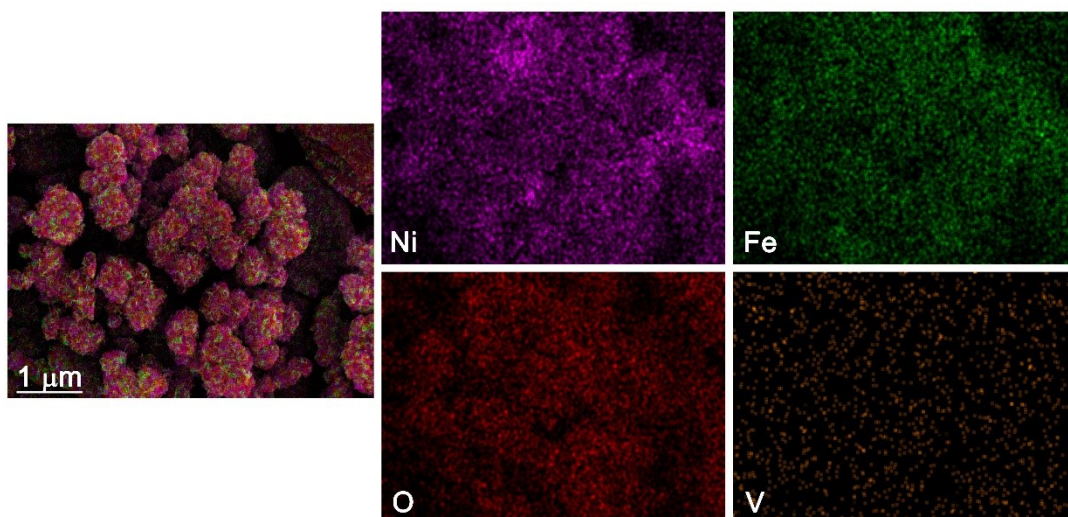

**Fig. S13.** SEM image and corresponding EDX mapping images of the NiFeV/NF after the OER stability test for 20 h.

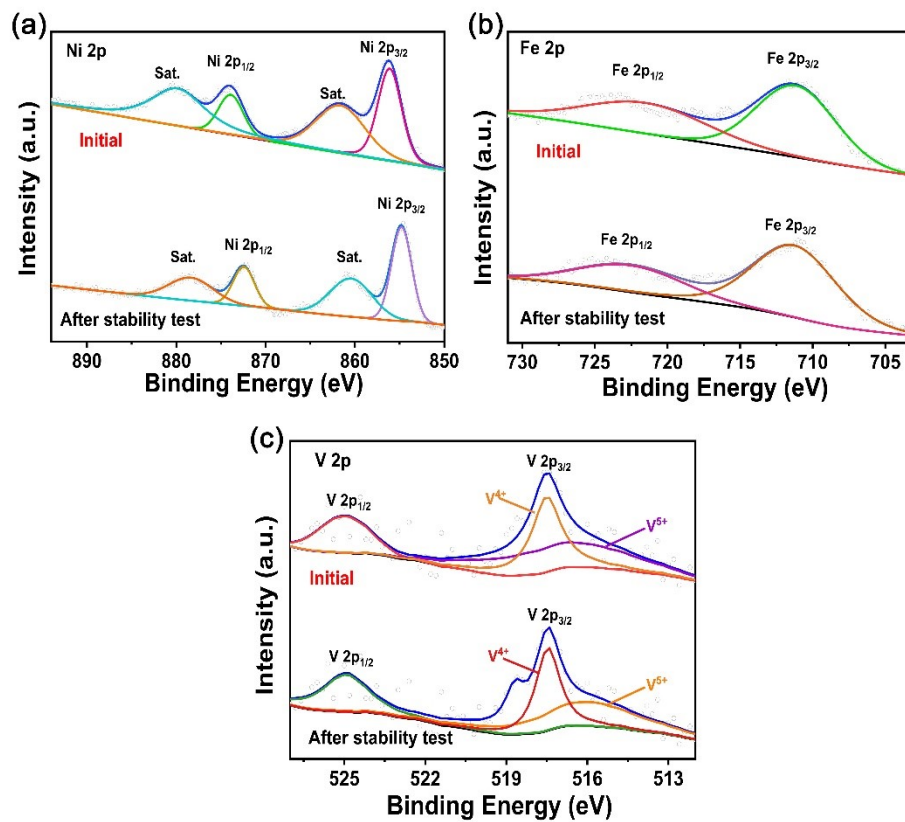

**Fig. S14.** XPS spectra comparison of fresh NiFeV/NF electrocatalyst and NiFeV/NF electrocatalysts after the OER stability tests. (a) Ni 2p, (b) Fe 2p, and (c) V 2p.

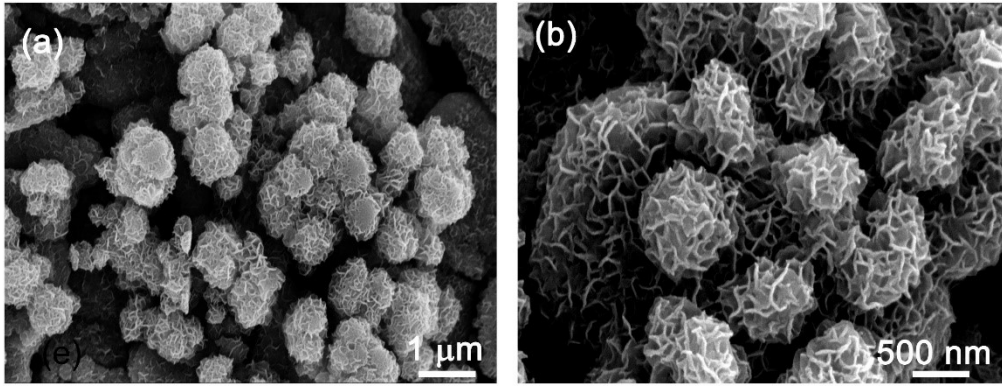

**Fig. S15.** SEM images of NiFeV/NF after 20 h stability test.

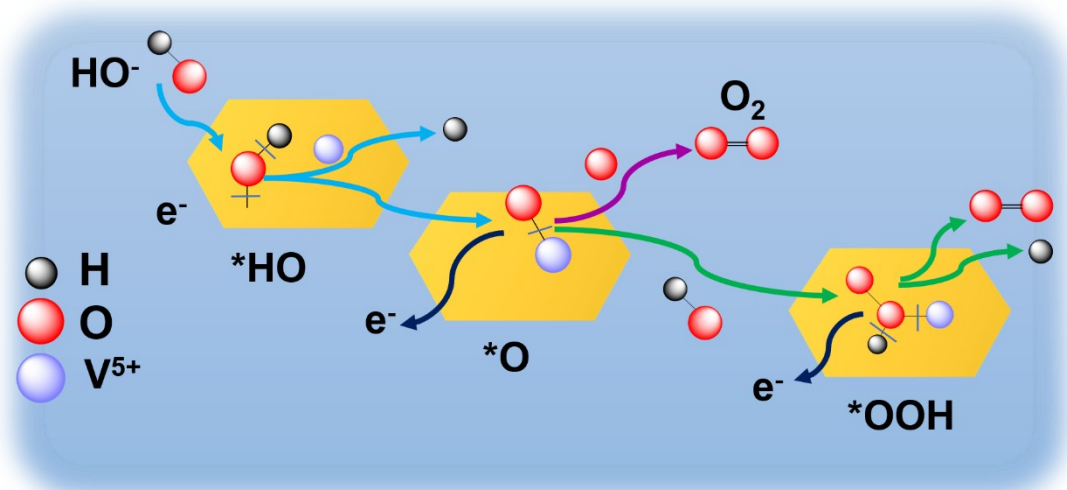

**Fig. S16.** Schematic illustration of the OER processes on the NiFeV/NF nanosheets, where \* represents the reaction sites of the electrocatalysts.

## Reference

- [1] S. Song, H. Bao, X. Lin, X.-L. Du, J. Zhou, L. Zhang, N. Chen, J. Hu and J.-Q. Wang, *J. Energy Chem.*, 2020, 42, 5-10.
- [2] Z. Lu, W. Xu, W. Zhu, Q. Yang, X. Lei, J. Liu, Y. Li, X. Sun and X. Duan, *Chem. Commun.*, 2014, 50, 6479-6482.
- [3] H. Wu, J. Wang, J. Yan, Z. Wu and W. Jin, *Nanoscale*, 2019, 11, 20144-20150.
- [4] Y. Gu, S. Chen, J. Ren, Y. A. Jia, C. Chen, S. Komarneni, D. Yang and X. Yao, *Acs Nano*, 2018, 12, 245-253.
- [5] L. An, J. Feng, Y. Zhang, R. Wang, H. Liu, G.-C. Wang, F. Cheng and P. Xi, *Adv. Funct. Mater.*, 2019, 29.
- [6] Y. Yang, Z. Lin, S. Gao, J. Su, Z. Lun, G. Xia, J. Chen, R. Zhang and Q. Chen, *ACS Catal*, 2017, 7, 469-479.
- [7] Z. Lu, L. Qian, Y. Tian, Y. Li, X. Sun and X. Duan, *Chem. Commun.*, 2016, 52, 908-911.
- [8] B. Weng, F. Xu, C. Wang, W. Meng, C. R. Grice and Y. Yan, *Energy Environ. Sci.*, 2017, 10, 121-128.
- [9] Z. Zhang, Y. Qin, M. Dou, J. Ji and F. Wang, *Nano Energy*, 2016, 30, 426-433.
- [10] H. Zhang, Y. Liu, T. Chen, J. Zhang, J. Zhang and X. W. Lou, *Adv. Mater.*, 2019, 31.
